# Supplementary material for: Efficiency enhancement of organic photovoltaics by introducing high-mobility curved small-molecule semiconductors as additives
Source: Royal Society of Chemistry journal article supplement (doi:10.1039/c9ta02636c), 2019-01-01
Supplement: c9ta02636c1.pdf [file c9ta02636c1.pdf]

## Electronic Supplementary Information

### Efficiency Enhancement of Organic Photovoltaics by Introducing High-Mobility Curved Small-Molecule Semiconductors as Additives

Shenghua Liu<sup>a</sup>, Changqing Li<sup>b</sup>, Xiaomin Xu<sup>b</sup>, Peng You<sup>a</sup>, Naixiang Wang<sup>a</sup>, Jianfang Wang<sup>c</sup>, Qian Miao<sup>b,\*</sup>, and Feng Yan<sup>a,\*</sup>

<sup>a</sup> Department of Applied Physics, The Hong Kong Polytechnic University, Hong Kong, China

\*E-mail: [apafyan@polyu.edu.hk](mailto:apafyan@polyu.edu.hk)

<sup>b</sup> Department of Chemistry, The Chinese University of Hong Kong, Shatin, Hong Kong, China.

\*E-mail: [miaoqian@cuhk.edu.hk](mailto:miaoqian@cuhk.edu.hk)

<sup>c</sup> Department of Physics, The Chinese University of Hong Kong, Shatin, Hong Kong, China.

## Figures

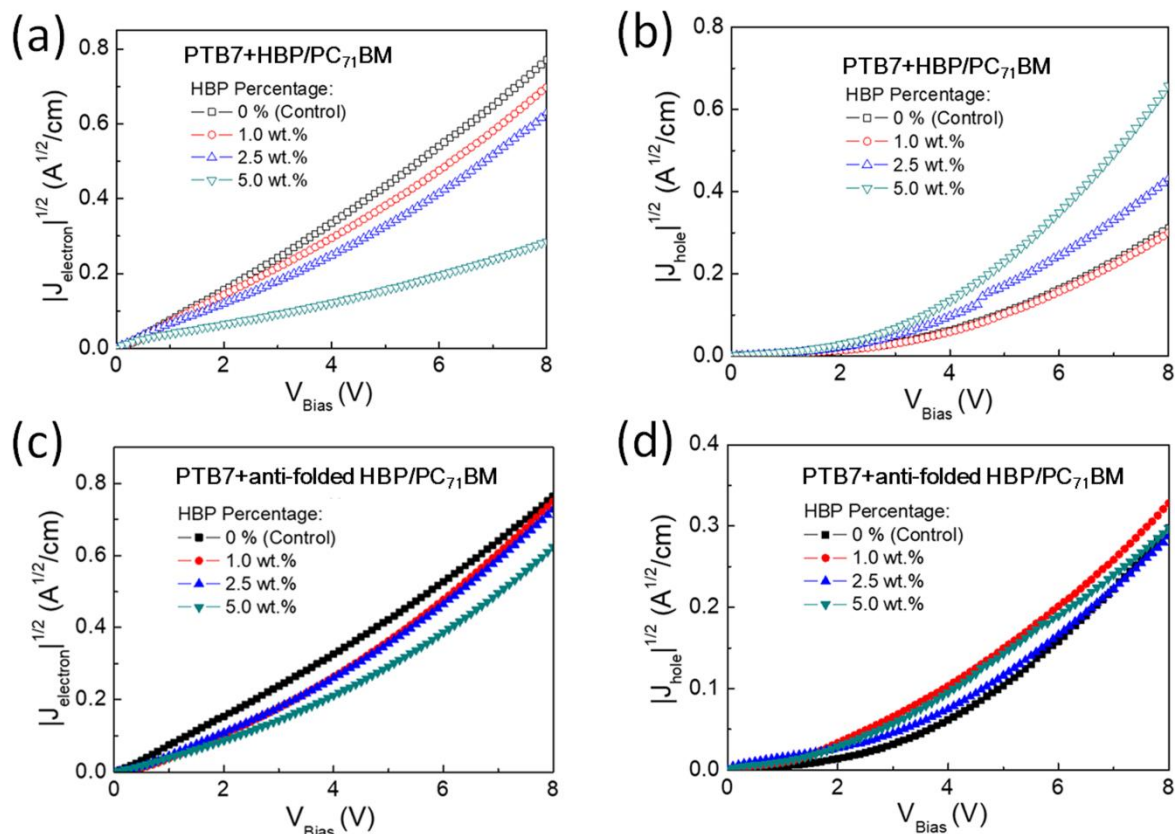

**Figure S1.** Square root of electron current densities versus bias voltage of the ITO/PEDOT:PSS/PTB7+HBP/PC<sub>71</sub>BM/Au devices with (a) different HBP percentage or (b) twisted & anti HBP percentage; Square root of hole current densities versus bias voltage of the ITO/ZnO/PTB7+HBP/PC<sub>71</sub>BM/Al devices with (c) different HBP percentage or (d) different twisted & anti HBP percentage.

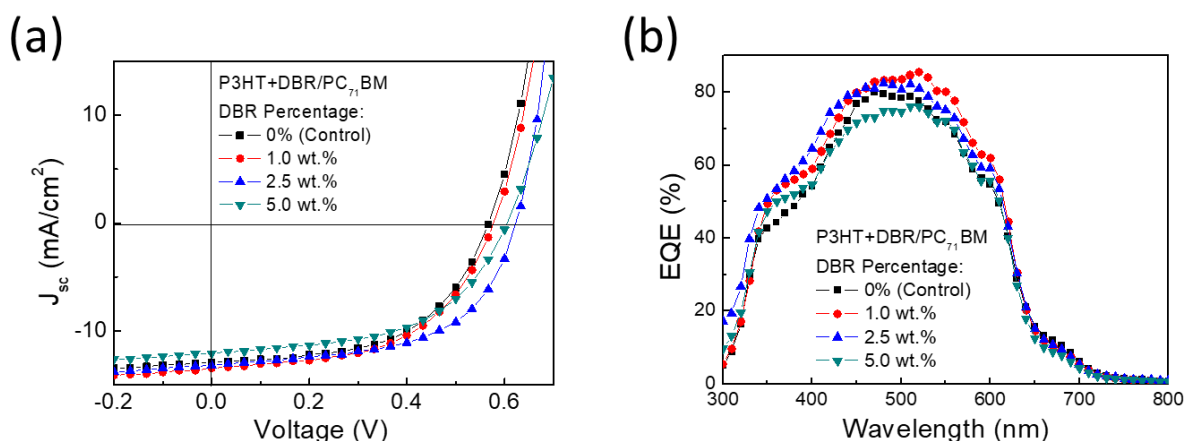

**Figure S2.** (a)  $J$ - $V$  and (b) EQE curves of the OPVs based on P3HT/PC<sub>71</sub>BM with different addition levels of DBR.

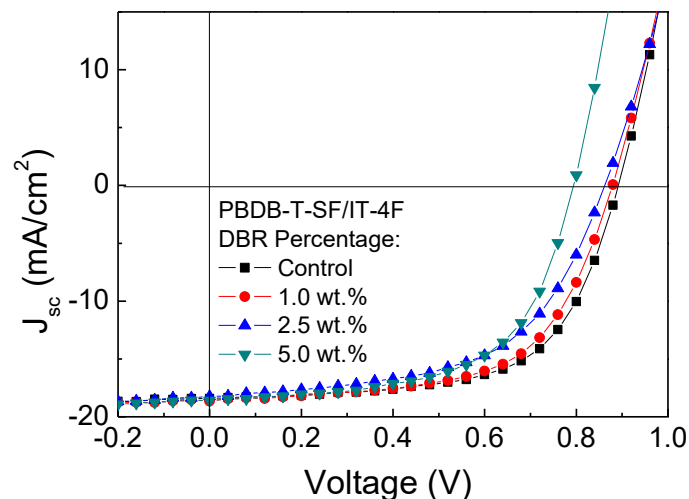

**Figure S3.** *J*-*V* curves of the OPVs based on PBDB-T-SF/IT-4F with different addition levels of DBR.

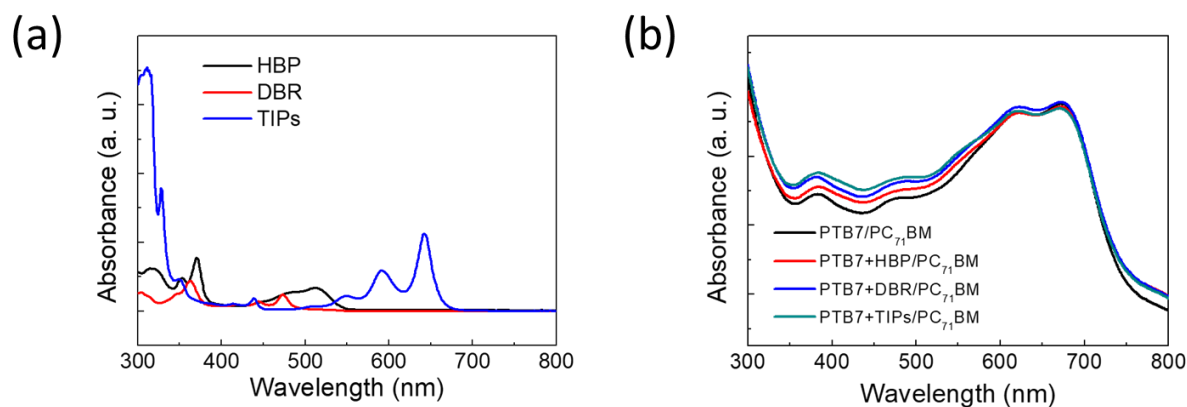

**Figure S4.** The UV-vis absorption spectra of (a) three additives (HBP/DBR/TIPs) in solution ( $5 \times 10^{-6}$  M in  $\text{CH}_2\text{Cl}_2$ ), and (b) blend films based on PTB7/ $\text{PC}_{71}\text{BM}$  with different additives at the same addition level (2.5 wt. %).

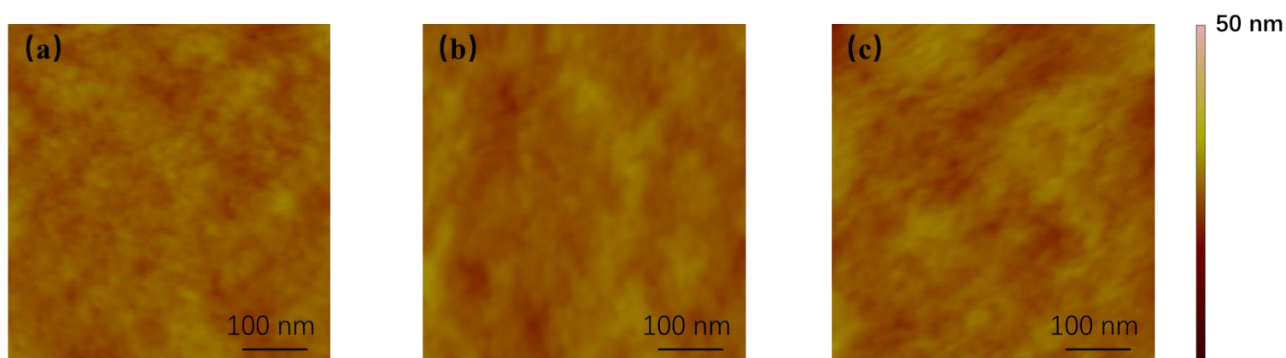

**Figure S5.** AFM images of the surface morphologies of (a) pristine PTB7/ $\text{PC}_{71}\text{BM}$  blend film, PTB7/ $\text{PC}_{71}\text{BM}$  blend film with addition of 2.5 wt.% (b) HBP or (c) DBR.

## Tables:

**Table S1.** Summary of photovoltaic performance of devices based on PTB7/PC<sub>71</sub>BM with HBP as additive.

| Addition level of HBP in active layer |         | V <sub>oc</sub><br>(V) | J <sub>sc</sub><br>(mA/cm <sup>2</sup> ) | J <sub>sc</sub><br>integrated<br>from EQE<br>(mA/cm <sup>2</sup> ) | FF<br>(%) | PCE<br>(%) | Relative PCE<br>Enhancement (%) |
|---------------------------------------|---------|------------------------|------------------------------------------|--------------------------------------------------------------------|-----------|------------|---------------------------------|
| Control                               | Average | 0.724                  | 15.50                                    | 14.65                                                              | 69.5      | 7.80±0.06  | /                               |
|                                       | Best    | 0.742                  | 17.84                                    | 16.91                                                              | 70.0      | 9.26       | 18.7                            |
| 1.0 wt. %                             | Average | 0.730                  | 17.83                                    | /                                                                  | 70.2      | 9.14±0.07  | 17.2±0.9                        |
|                                       | Best    | 0.742                  | 17.84                                    | 16.91                                                              | 70.0      | 9.26       | 18.7                            |
| 2.5 wt. %                             | Average | 0.746                  | 18.86                                    | /                                                                  | 67.8      | 9.54±0.07  | 22.3±0.9                        |
|                                       | Best    | 0.754                  | 18.77                                    | 17.67                                                              | 68.0      | 9.63       | 23.5                            |
| 5.0 wt. %                             | Average | 0.739                  | 16.37                                    | /                                                                  | 70.6      | 8.54±0.09  | 9.5±1.2                         |
|                                       | Best    | 0.745                  | 16.53                                    | 15.61                                                              | 70.5      | 8.68       | 11.3                            |

**Table S2.** Summary of the photovoltaic performance of devices based on PTB7/PC<sub>71</sub>BM with twisted & anti HBP as additive.

| Addition level of <u>twisted &amp; anti HBP</u> in active layer |         | V <sub>oc</sub><br>(V) | J <sub>sc</sub><br>(mA/cm <sup>2</sup> ) | FF<br>(%) | PCE<br>(%) | Relative PCE<br>Enhancement (%) |
|-----------------------------------------------------------------|---------|------------------------|------------------------------------------|-----------|------------|---------------------------------|
| Control                                                         | Average | 0.726                  | 15.76                                    | 67.0      | 7.67±0.14  | /                               |
|                                                                 | Best    | 0.742                  | 14.49                                    | 68.6      | 7.36       | -4.0                            |
| 1.0 wt. %                                                       | Average | 0.731                  | 14.36                                    | 69.5      | 7.30±0.05  | -4.8±0.7                        |
|                                                                 | Best    | 0.742                  | 14.49                                    | 68.6      | 7.36       | -4.0                            |
| 2.5 wt. %                                                       | Average | 0.735                  | 13.57                                    | 68.4      | 6.82±0.02  | -11.1±0.3                       |
|                                                                 | Best    | 0.748                  | 13.62                                    | 67.1      | 6.85       | -10.7                           |
| 5.0 wt. %                                                       | Average | 0.737                  | 13.43                                    | 63.0      | 6.24±0.01  | -18.6±0.1                       |
|                                                                 | Best    | 0.730                  | 13.49                                    | 63.5      | 6.25       | -18.5                           |

**Table S3.** Summary of the photovoltaic performance of devices based on PBDTTT-EFT/PC<sub>71</sub>BM with HBP as additive.

| Addition level of HBP in active layer |         | V <sub>oc</sub><br>(V) | J <sub>sc</sub><br>(mA/cm <sup>2</sup> ) | J <sub>sc</sub><br>integrated<br>from EQE<br>(mA/cm <sup>2</sup> ) | FF<br>(%) | PCE<br>(%) | Relative PCE<br>Enhancement (%) |
|---------------------------------------|---------|------------------------|------------------------------------------|--------------------------------------------------------------------|-----------|------------|---------------------------------|
| Control                               | Average | 0.779                  | 17.25                                    | 16.97                                                              | 67.2      | 9.03±0.07  | /                               |
| 1.0 wt.%                              | Average | 0.784                  | 18.57                                    | /                                                                  | 68.1      | 9.91±0.10  | 9.7±1.1                         |
|                                       | Best    | 0.795                  | 18.51                                    | 17.89                                                              | 68.4      | 10.07      | 11.5                            |
| 2.5 wt.%                              | Average | 0.796                  | 17.96                                    | /                                                                  | 67.2      | 9.61±0.10  | 6.4±1.1                         |
|                                       | Best    | 0.801                  | 18.04                                    | 17.48                                                              | 67.5      | 9.75       | 8.0                             |
| 5.0 wt.%                              | Average | 0.794                  | 16.36                                    | /                                                                  | 67.6      | 8.78±0.14  | -2.8±1.6                        |
|                                       | Best    | 0.800                  | 16.67                                    | 16.67                                                              | 67.6      | 9.02       | -0.1                            |

**Table S4.** Summary of the photovoltaic performance of devices based on PTB7/PC<sub>71</sub>BM with DBR as additive.

| Addition level of DBR in active layer |         | V <sub>oc</sub><br>(V) | J <sub>sc</sub><br>(mA/cm <sup>2</sup> ) | J <sub>sc</sub><br>integrated<br>from EQE<br>(mA/cm <sup>2</sup> ) | FF<br>(%) | PCE<br>(%) | Relative PCE<br>Enhancement (%) |
|---------------------------------------|---------|------------------------|------------------------------------------|--------------------------------------------------------------------|-----------|------------|---------------------------------|
| Control                               | Average | 0.722                  | 15.37                                    | 15.18                                                              | 69.6      | 7.72±0.03  | /                               |
| 1.0 wt.%                              | Average | 0.731                  | 16.55                                    | /                                                                  | 65.9      | 7.97±0.03  | 3.2±0.4                         |
|                                       | Best    | 0.739                  | 16.31                                    | 15.50                                                              | 66.5      | 8.01       | 3.8                             |
| 2.5 wt.%                              | Average | 0.745                  | 17.03                                    | /                                                                  | 68.0      | 8.63±0.05  | 11.8±0.6                        |
|                                       | Best    | 0.751                  | 16.92                                    | 16.02                                                              | 68.5      | 8.70       | 12.7                            |
| 5.0 wt.%                              | Average | 0.732                  | 15.16                                    | /                                                                  | 69.2      | 7.68±0.08  | -0.5±1.0                        |
|                                       | Best    | 0.742                  | 15.01                                    | 14.23                                                              | 69.9      | 7.78       | 0.8                             |

**Table S5.** Summary of the photovoltaic performance of OPVs based on PBDTTT-EFT/PC<sub>71</sub>BM with DBR as additive.

| Addition level of DBR in active layer |         | V <sub>oc</sub><br>(V) | J <sub>sc</sub><br>(mA/cm <sup>2</sup> ) | J <sub>sc</sub><br>integrated<br>from EQE<br>(mA/cm <sup>2</sup> ) | FF<br>(%) | PCE<br>(%) | Relative PCE<br>Enhancement<br>(%) |
|---------------------------------------|---------|------------------------|------------------------------------------|--------------------------------------------------------------------|-----------|------------|------------------------------------|
| Control                               | Average | 0.769                  | 17.64                                    | 16.07                                                              | 67.0      | 9.09±0.05  | /                                  |
| 1.0 wt. %                             | Average | 0.778                  | 18.37                                    | /                                                                  | 67.9      | 9.70±0.07  | 6.7±0.8                            |
|                                       | Best    | 0.777                  | 18.42                                    | 17.49                                                              | 68.2      | 9.76       | 7.4                                |
| 2.5 wt. %                             | Average | 0.786                  | 19.58                                    | /                                                                  | 67.8      | 10.43±0.10 | 14.7±1.1                           |
|                                       | Best    | 0.791                  | 19.72                                    | 18.74                                                              | 68.1      | 10.62      | 16.8                               |
| 5.0 wt. %                             | Average | 0.778                  | 18.28                                    | /                                                                  | 65.6      | 9.33±0.04  | 2.6±0.4                            |
|                                       | Best    | 0.788                  | 18.01                                    | 17.11                                                              | 66.2      | 9.39       | 3.3                                |

**Table S6.** Summary of the photovoltaic performance of OPVs based on PBDTTT-EFT+DBR/PC<sub>71</sub>BM with different addition levels (solution volume percentage) of Au@Ag NCs in PEDOT:PSS.

| Addition level of Au@Ag NCs in PEDOT:PSS layer |         | V <sub>oc</sub><br>(V) | J <sub>sc</sub><br>(mA/cm <sup>2</sup> ) | J <sub>sc</sub><br>integrated<br>from EQE<br>(mA/cm <sup>2</sup> ) | FF<br>(%) | PCE<br>(%) | Relative PCE<br>Enhancement<br>(%) |
|------------------------------------------------|---------|------------------------|------------------------------------------|--------------------------------------------------------------------|-----------|------------|------------------------------------|
| Control                                        | Average | 0.792                  | 18.93                                    | 17.89                                                              | 68.5      | 10.27±0.09 | /                                  |
| 1.0 wt. %                                      | Average | 0.796                  | 19.32                                    | /                                                                  | 70.0      | 10.76±0.07 | 4.8±0.7                            |
|                                                | Best    | 0.795                  | 19.40                                    | 18.30                                                              | 70.3      | 10.85      | 5.6                                |
| 5.0 wt. %                                      | Average | 0.796                  | 20.29                                    | /                                                                  | 70.7      | 11.42±0.13 | 11.2±1.3                           |
|                                                | Best    | 0.798                  | 20.73                                    | 19.58                                                              | 70.7      | 11.69      | 13.8                               |
| 10 wt. %                                       | Average | 0.800                  | 18.94                                    | /                                                                  | 69.0      | 10.46±0.05 | 1.9±0.5                            |
|                                                | Best    | 0.799                  | 19.27                                    | 18.21                                                              | 68.3      | 10.52      | 2.4                                |

**Table S7.** Summary of the photovoltaic performance of devices based on PTB7/PC<sub>71</sub>BM with TIPs-Pentacene as additive.

| Addition level of TIPs-Pentacene in active layer |         | V <sub>oc</sub><br>(V) | J <sub>sc</sub><br>(mA/cm <sup>2</sup> ) | FF<br>(%) | PCE<br>(%) | Relative PCE<br>Enhancement (%) |
|--------------------------------------------------|---------|------------------------|------------------------------------------|-----------|------------|---------------------------------|
| Control                                          | Average | 0.724                  | 15.50                                    | 69.5      | 7.80±0.06  | /                               |
| 1.0 wt. %                                        | Average | 0.748                  | 16.80                                    | 66.5      | 8.42±0.12  | 7.9±1.5                         |
|                                                  | Best    | 0.754                  | 16.80                                    | 68.3      | 8.60       | 10.3                            |
| 5.0 wt. %                                        | Average | 0.745                  | 15.73                                    | 67.4      | 7.90±0.08  | 1.3±1.0                         |
|                                                  | Best    | 0.751                  | 15.77                                    | 68.5      | 7.99       | 2.4                             |
| 10 wt. %                                         | Average | 0.753                  | 15.15                                    | 67.8      | 7.73±0.04  | -0.9±0.5                        |
|                                                  | Best    | 0.757                  | 15.05                                    | 67.9      | 7.77       | -0.4                            |

**Table S8.** Summary of the photovoltaic performance of OPVs based on PBDTTT-EFT/PC<sub>71</sub>BM with TIPs-Pentacene as additive.

| Addition level of TIPs-Pentacene in active layer |         | V <sub>oc</sub><br>(V) | J <sub>sc</sub><br>(mA/cm <sup>2</sup> ) | FF<br>(%) | PCE<br>(%) | Relative PCE<br>Enhancement (%) |
|--------------------------------------------------|---------|------------------------|------------------------------------------|-----------|------------|---------------------------------|
| Control                                          | Average | 0.785                  | 17.71                                    | 63.4      | 8.82±0.08  | /                               |
| 1.0 wt. %                                        | Average | 0.790                  | 18.09                                    | 63.4      | 9.06±0.06  | 2.7±0.7                         |
|                                                  | Best    | 0.796                  | 18.04                                    | 63.5      | 9.12       | 3.4                             |
| 2.5 wt. %                                        | Average | 0.792                  | 17.86                                    | 61.2      | 8.66±0.03  | -1.8±0.3                        |
|                                                  | Best    | 0.796                  | 17.98                                    | 60.7      | 8.69       | -1.5                            |
| 5.0 wt. %                                        | Average | 0.800                  | 17.22                                    | 60.9      | 8.39±0.18  | -4.9±2.0                        |
|                                                  | Best    | 0.806                  | 17.30                                    | 61.2      | 8.53       | -3.3                            |

**Table S9.** Summary of the photovoltaic performance of OPVs based on P3HT/PC<sub>71</sub>BM with DBR additive.

| Addition level of DBR in active layer |         | V <sub>oc</sub><br>(V) | J <sub>sc</sub><br>(mA/cm <sup>2</sup> ) | FF<br>(%) | PCE<br>(%) | Relative PCE Enhancement<br>(%) |
|---------------------------------------|---------|------------------------|------------------------------------------|-----------|------------|---------------------------------|
| Control                               | Average | 0.567                  | 12.86                                    | 55.0      | 4.01       | /                               |
| 1.0 wt. %                             | Average | 0.567                  | 13.30                                    | 55.2      | 4.16±0.01  | 3.74±0.25                       |
|                                       | Best    | 0.567                  | 13.43                                    | 54.8      | 4.17       | 3.99                            |
| 2.5 wt. %                             | Average | 0.617                  | 13.21                                    | 55.3      | 4.51±0.13  | 12.47±3.24                      |
|                                       | Best    | 0.633                  | 13.20                                    | 55.5      | 4.64       | 15.71                           |
| 5.0 wt. %                             | Average | 0.600                  | 12.04                                    | 54.1      | 3.91±0.02  | -2.49±0.50                      |
|                                       | Best    | 0.600                  | 12.08                                    | 54.0      | 3.92       | -2.24                           |

**Table S10.** Summary of the photovoltaic performance of OPVs based on PBDB-T-SF/IT-4F with DBR additive.

| Addition level of DBR in active layer |         | V <sub>oc</sub><br>(V) | J <sub>sc</sub><br>(mA/cm <sup>2</sup> ) | FF<br>(%) | PCE<br>(%) | Relative PCE Enhancement<br>(%) |
|---------------------------------------|---------|------------------------|------------------------------------------|-----------|------------|---------------------------------|
| Control                               | Average | 0.886                  | 18.44                                    | 62.7      | 10.25±0.08 | /                               |
| 1.0 wt. %                             | Average | 0.879                  | 18.60                                    | 60.4      | 9.87±0.02  | -3.7±0.2                        |
|                                       | Best    | 0.878                  | 18.64                                    | 60.3      | 9.89       | -3.5                            |
| 2.5 wt. %                             | Average | 0.871                  | 18.25                                    | 55.7      | 8.86±0.02  | -13.5±0.2                       |
|                                       | Best    | 0.861                  | 18.25                                    | 55.3      | 8.88       | -13.4                           |
| 5.0 wt. %                             | Average | 0.797                  | 18.60                                    | 59.3      | 8.79±0.03  | -14.2±0.3                       |
|                                       | Best    | 0.794                  | 18.59                                    | 59.3      | 8.81       | -14.0                           |
